# Supplementary material
Source: publisher site journal article supplement (https://www.dovepress.com/article/244024)

**Figure S1. TXNDC5 knockdown repressed HCC cell viability, colony formation and cell cycle and induced apoptosis.** SNU-387 and Huh7 cells were transfected with si-NC or si-TXNDC5. (A) The mRNA expression level of TXNDC5 in SNU-387 and Huh7 cells was determined by qRT-PCR. (B) The viability of SNU-387 and Huh7 cellswas measured by CCK-8 assay. (C) The apoptosis of SNU-387 and Huh7 cells was analyzed by flow cytometry analysis. (D) The colony formation ability of SNU-387 and Huh7 cells was assessed by colony formation assay. (E) Cell cycle process of SNU-387 and Huh7 cells was analyzed by flow cytometry analysis. **P*<0.05.


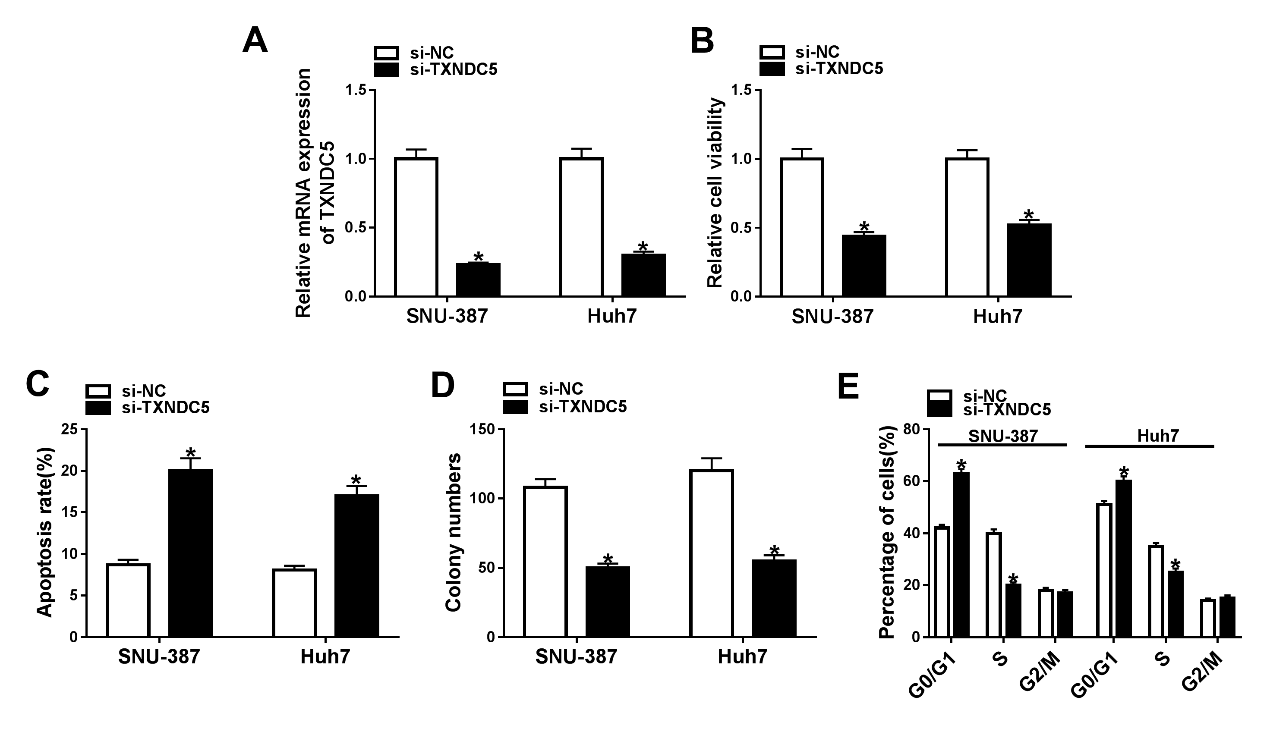

Supplement: Supplementary file 1 [file get_supplementary_file.php]
